# Supplementary material
Source: PubMed Central journal article supplement (PMC9973016)
Supplement: jvi.01379-22-s0001.pdf [file jvi.01379-22-s0001.pdf]

1 **Amino Acid Variation at Hemagglutinin Position 193 Impacts the Properties of H9N2 Avian**  
2 **Influenza Virus**

3 Zhimin Wan<sup>1,2,3,4##\*</sup>, Zhehong Zhao<sup>1,2,3,4#</sup>, Jianjun Sang<sup>5</sup>, Wenjie Jiang<sup>1,2,3,4</sup>, Jian Chen<sup>1,2,3,4</sup>, Ting  
4 Tang<sup>1,2,3,4</sup>, Yafeng Li<sup>1,2,3,4</sup>, Qiuqi Kan<sup>1,2,3,4</sup>, Hongxia Shao, Jianjun Zhang<sup>5</sup>, Quan Xie<sup>1,2,3,4</sup>, Tuofan  
5 Li<sup>1,2,3,4</sup>, Aijian Qin<sup>1,2,3\*</sup>, Jianqiang Ye<sup>1,2,3,4\*</sup>

6 <sup>1</sup>Key Laboratory of Jiangsu Preventive Veterinary Medicine, Key Laboratory for Avian Preventive  
7 Medicine, Ministry of Education, College of Veterinary Medicine, Yangzhou University,  
8 Yangzhou, Jiangsu, 225009, China;

9 <sup>2</sup>Jiangsu Co-innovation Center for Prevention and Control of Important Animal Infectious  
10 Diseases and Zoonoses, Yangzhou, Jiangsu, 225009, China;

11 <sup>3</sup>Joint International Research Laboratory of Agriculture and Agri-Product Safety, the Ministry of  
12 Education of China, Yangzhou University, Yangzhou, Jiangsu, 225009, China;

13 <sup>4</sup>Institute of Agricultural Science and Technology Development, Yangzhou University, Yangzhou,  
14 Jiangsu Province, 225009, China;

15 <sup>5</sup>Sinopharm Yangzhou VAC Biological Engineering Co. Ltd, Yangzhou, Jiangsu, 225127, China.

16

17 #Zhimin Wan and Zhehong Zhao contributed equally to this work.

18

19 \*Correspondence shall be directed to:

20 Dr. Zhimin Wan by [wanzm@yzu.edu.cn](mailto:wanzm@yzu.edu.cn)

21 Prof. Aijian Qin by [aijian@yzu.edu.cn](mailto:aijian@yzu.edu.cn)

22 Prof. Jianqiang Ye by [jqye@yzu.edu.cn](mailto:jqye@yzu.edu.cn).

23

24

25

26

27

28

29

30

31

32

33 **SUPPLEMENT FIGURE LEGEND**

34 **Fig. S1:** Replication and transmission of the H9N2 viruses with various amino acids at HA  
35 position 193 in chickens. Groups of 2 weeks-old chickens were infected intranasally with  $10^5$   
36 TCID<sub>50</sub> of each virus and five uninfected chickens were introduced as direct-contact group. At 3  
37 and 5 dpi, three chickens each infected group were sacrificed and lung samples were collected to  
38 determine virus titers (A). At 2, 4, 6, 8 and 10 dpi, oropharyngeal (B) and cloaca (C) swabs from  
39 infected and contact groups were collected to determine the virus titers. The statistical analysis  
40 was performed with Mann Whitney U test. \*, \*\*, and \*\*\* indicate *P* values of less than 0.05, 0.01  
41 and 0.001, respectively.

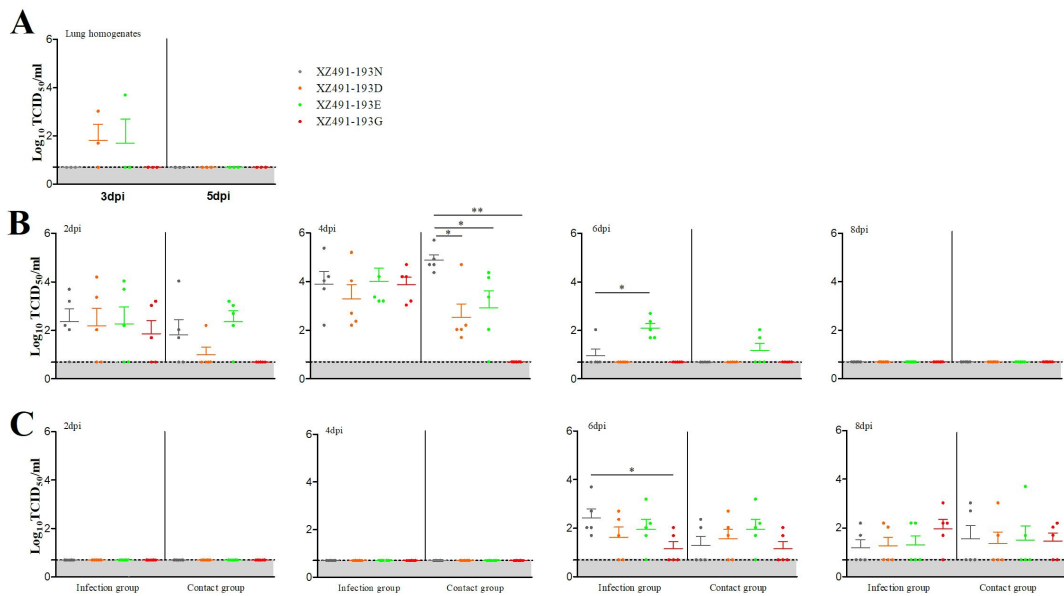

42

43

44

45

46

47

48

49

50

51

52

53

54 **Fig. S2:** Antibody response in chickens to H9N2 viruses with various amino acids at HA position  
55 193. Shown were HI titers of sera collected at 7, 14 and 21 dpi from chickens in infected and  
56 direct-contact groups. The statistical analysis was performed with Mann Whitney U test. \*, \*\*,  
57 and \*\*\* indicate *P* values of less than 0.05, 0.01 and 0.001, respectively.

58

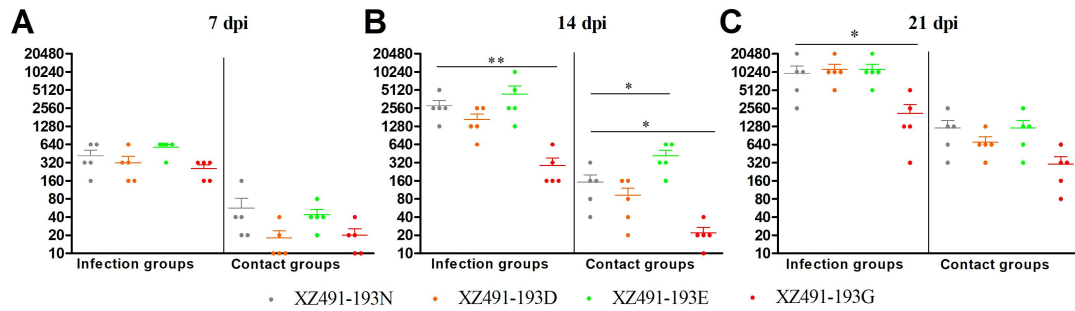

59
